# Supplementary material for: Effects of Eggshell Thickness, Calcium Content, and Number of Pores in Erosion Craters on Hatching Rate of Chinese Alligator Eggs
Source: MDPI journal article supplement (doi:10.3390/ani13081405), 2023-04-19
Supplement: s1 [file s1]

**Supplementary Table S1.** Normal Test Table for Number of erosion crater pores and Thickness at Cracking End, Middle End, and Complete End of Eggshell

|           | Number of erosion crater pores |       |       | Thickness |       |       |
|-----------|--------------------------------|-------|-------|-----------|-------|-------|
|           | CE                             | ME    | IE    | CE        | ME    | IE    |
| statistic | 0.195                          | 0.144 | 0.238 | 0.079     | 0.088 | 0.062 |
| df        | 80                             | 80    | 80    | 80        | 80    | 80    |
| Sig.      | 0.000                          | 0.003 | 0.000 | 0.200     | 0.200 | 0.200 |

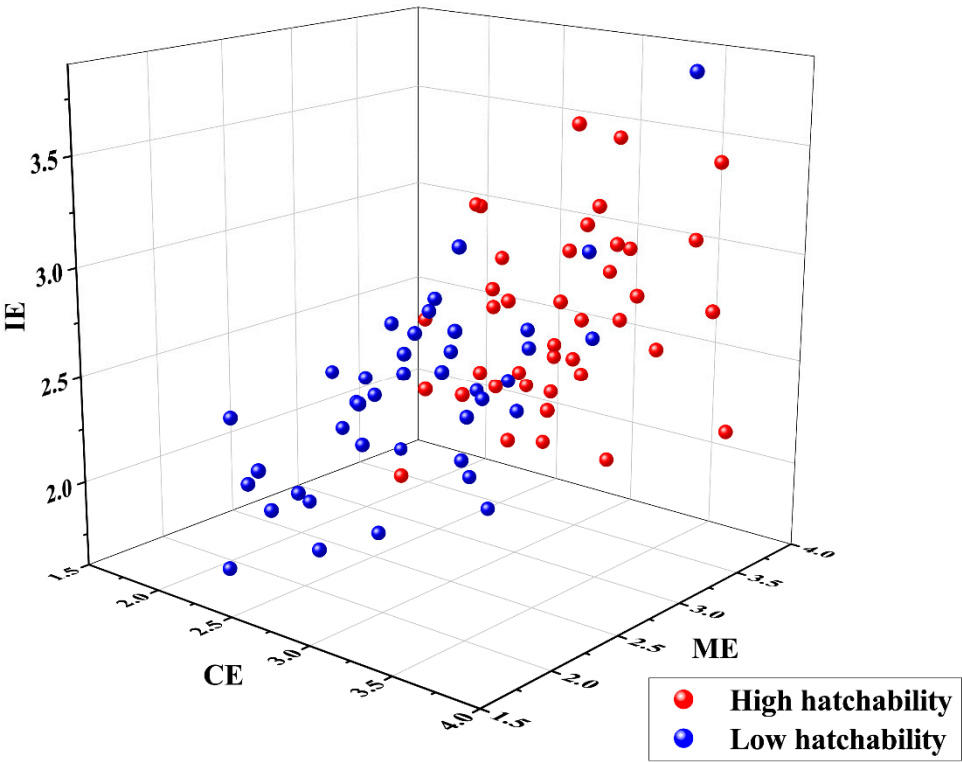

**Supplementary Fig. S1.** 3D map of average eggshell thickness

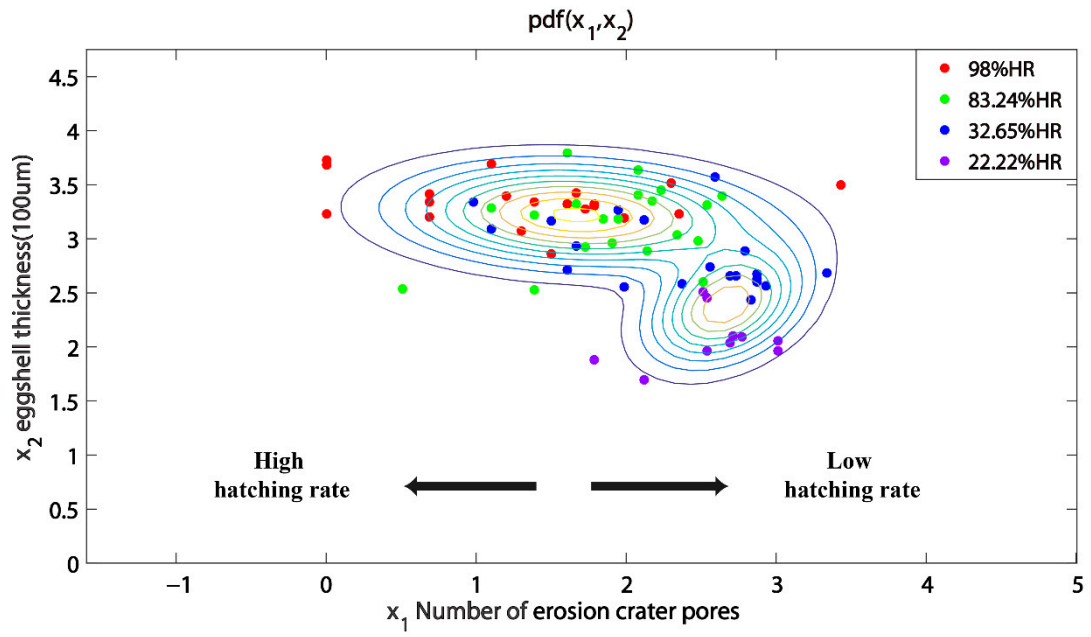

**Supplementary Fig. S2.** ME Gaussian Mixture Clustering Model

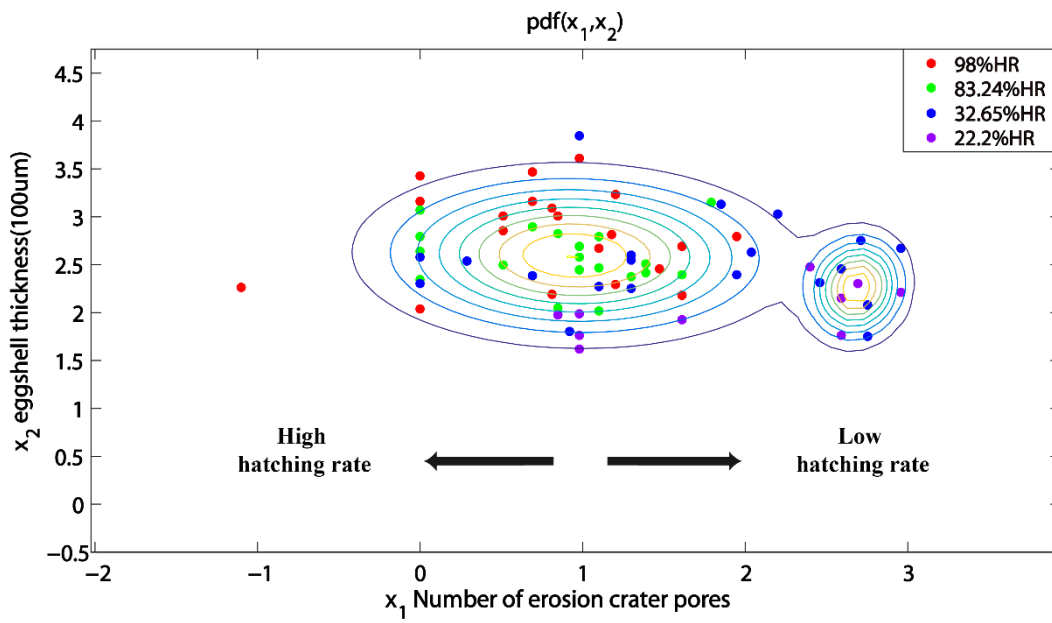

**Supplementary Fig. S3.** IE Gaussian Mixture Clustering Model

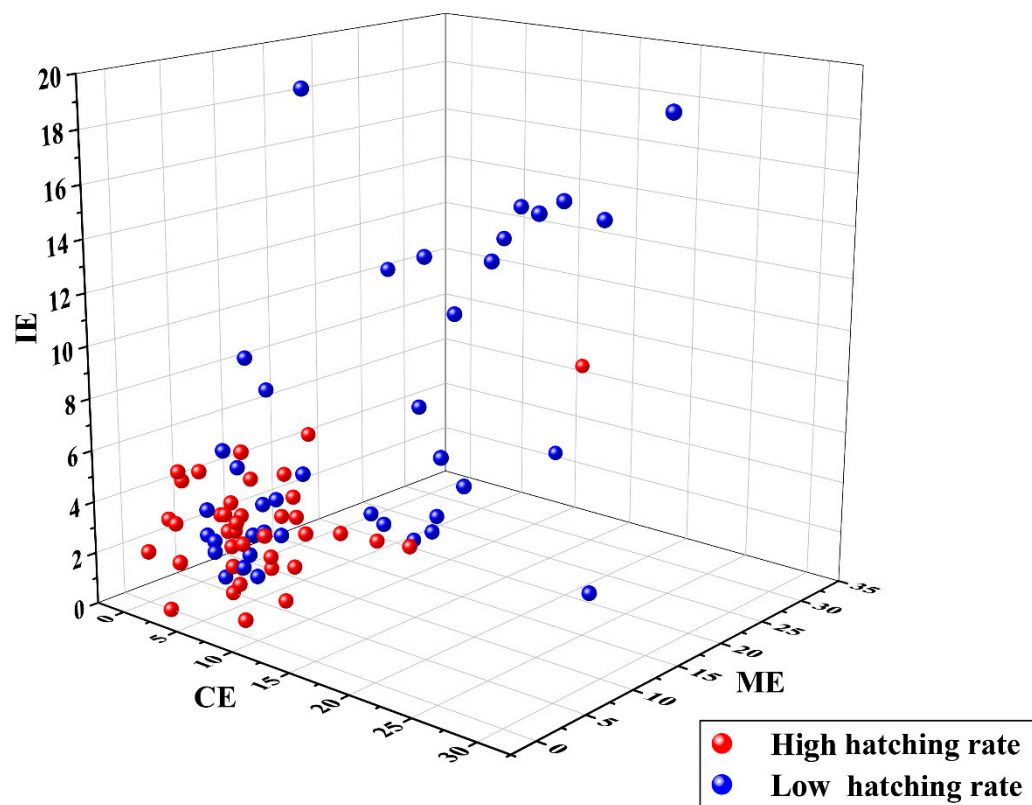

**Supplementary Fig. S4.** 3D map of average the number of erosion crater pores

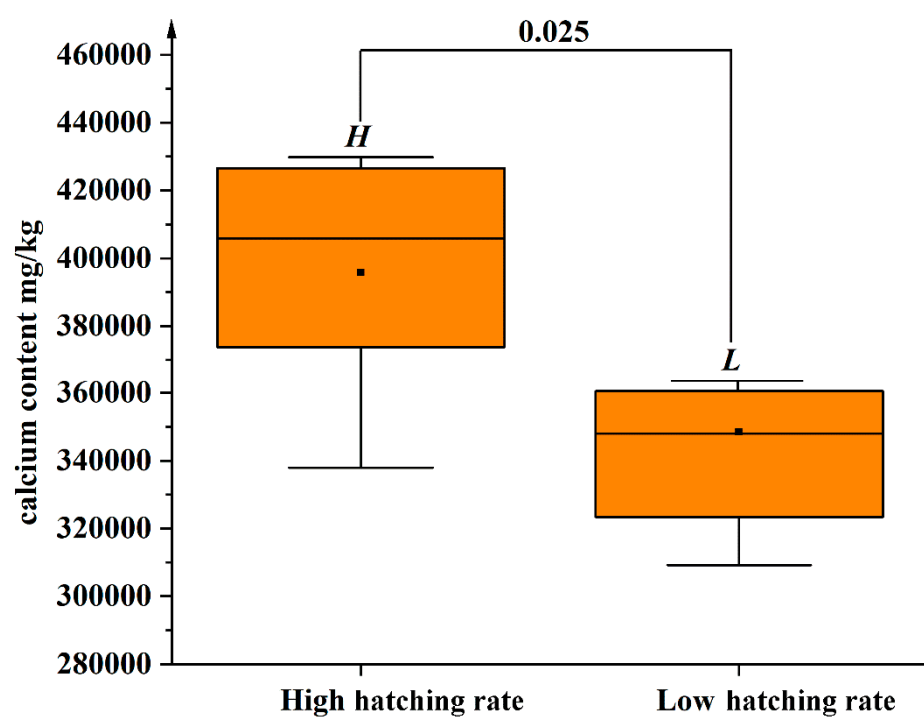

**Supplementary Fig. S5.** Calcium content in eggshells with different hatching rates
